# Supplementary material
Source: PubMed Central journal article supplement (PMC4938738)
Supplement: NIHMS790455-supplement-308238R2_Online_Data_Supplement.pdf [file NIHMS790455-supplement-308238R2_Online_Data_Supplement.pdf]

**Online Figures and Online Tables for:**

DUSP8 regulates cardiac ventricular remodeling by altering ERK1/2 signaling

Ruijie Liu, Jop H. van Berlo, Allen J. York, Marjorie Maillet, Ronald J. Vagnozzi, Jeffery D. Molkentin

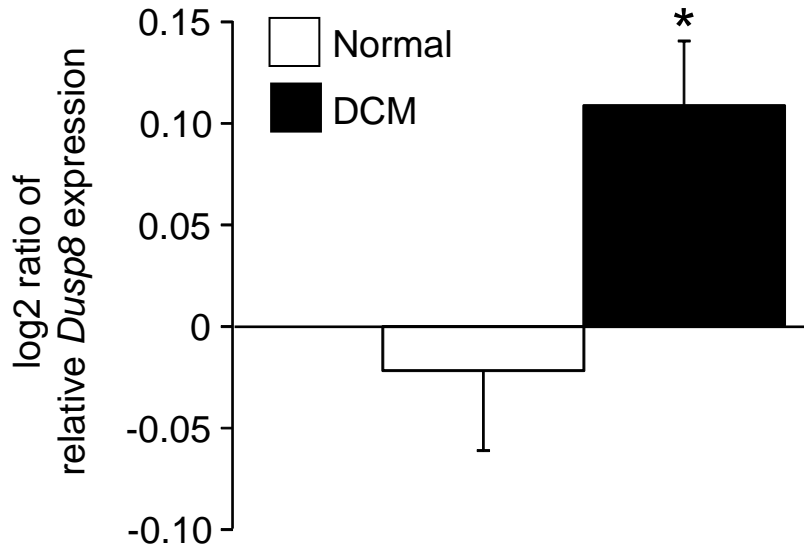

**Online Figure I. *Dusp8* mRNA is highly expressed in human dilated cardiomyopathy patients.** Data in the National Center for Biotechnology Information Gene Expression Omnibus (NCBI GEO) database contained an elaborate microarray experiment from human heart biopsies (GEO accession GDS2206, reference #32) that showed an increase in *Dusp8* mRNA in patients with dilated cardiomyopathy (DCM). Available data included 15 normal hearts samples and 13 dilated cardiomyopathy samples examined with custom made microarrays to assess mRNA levels. \* $p < 0.05$  vs normal.

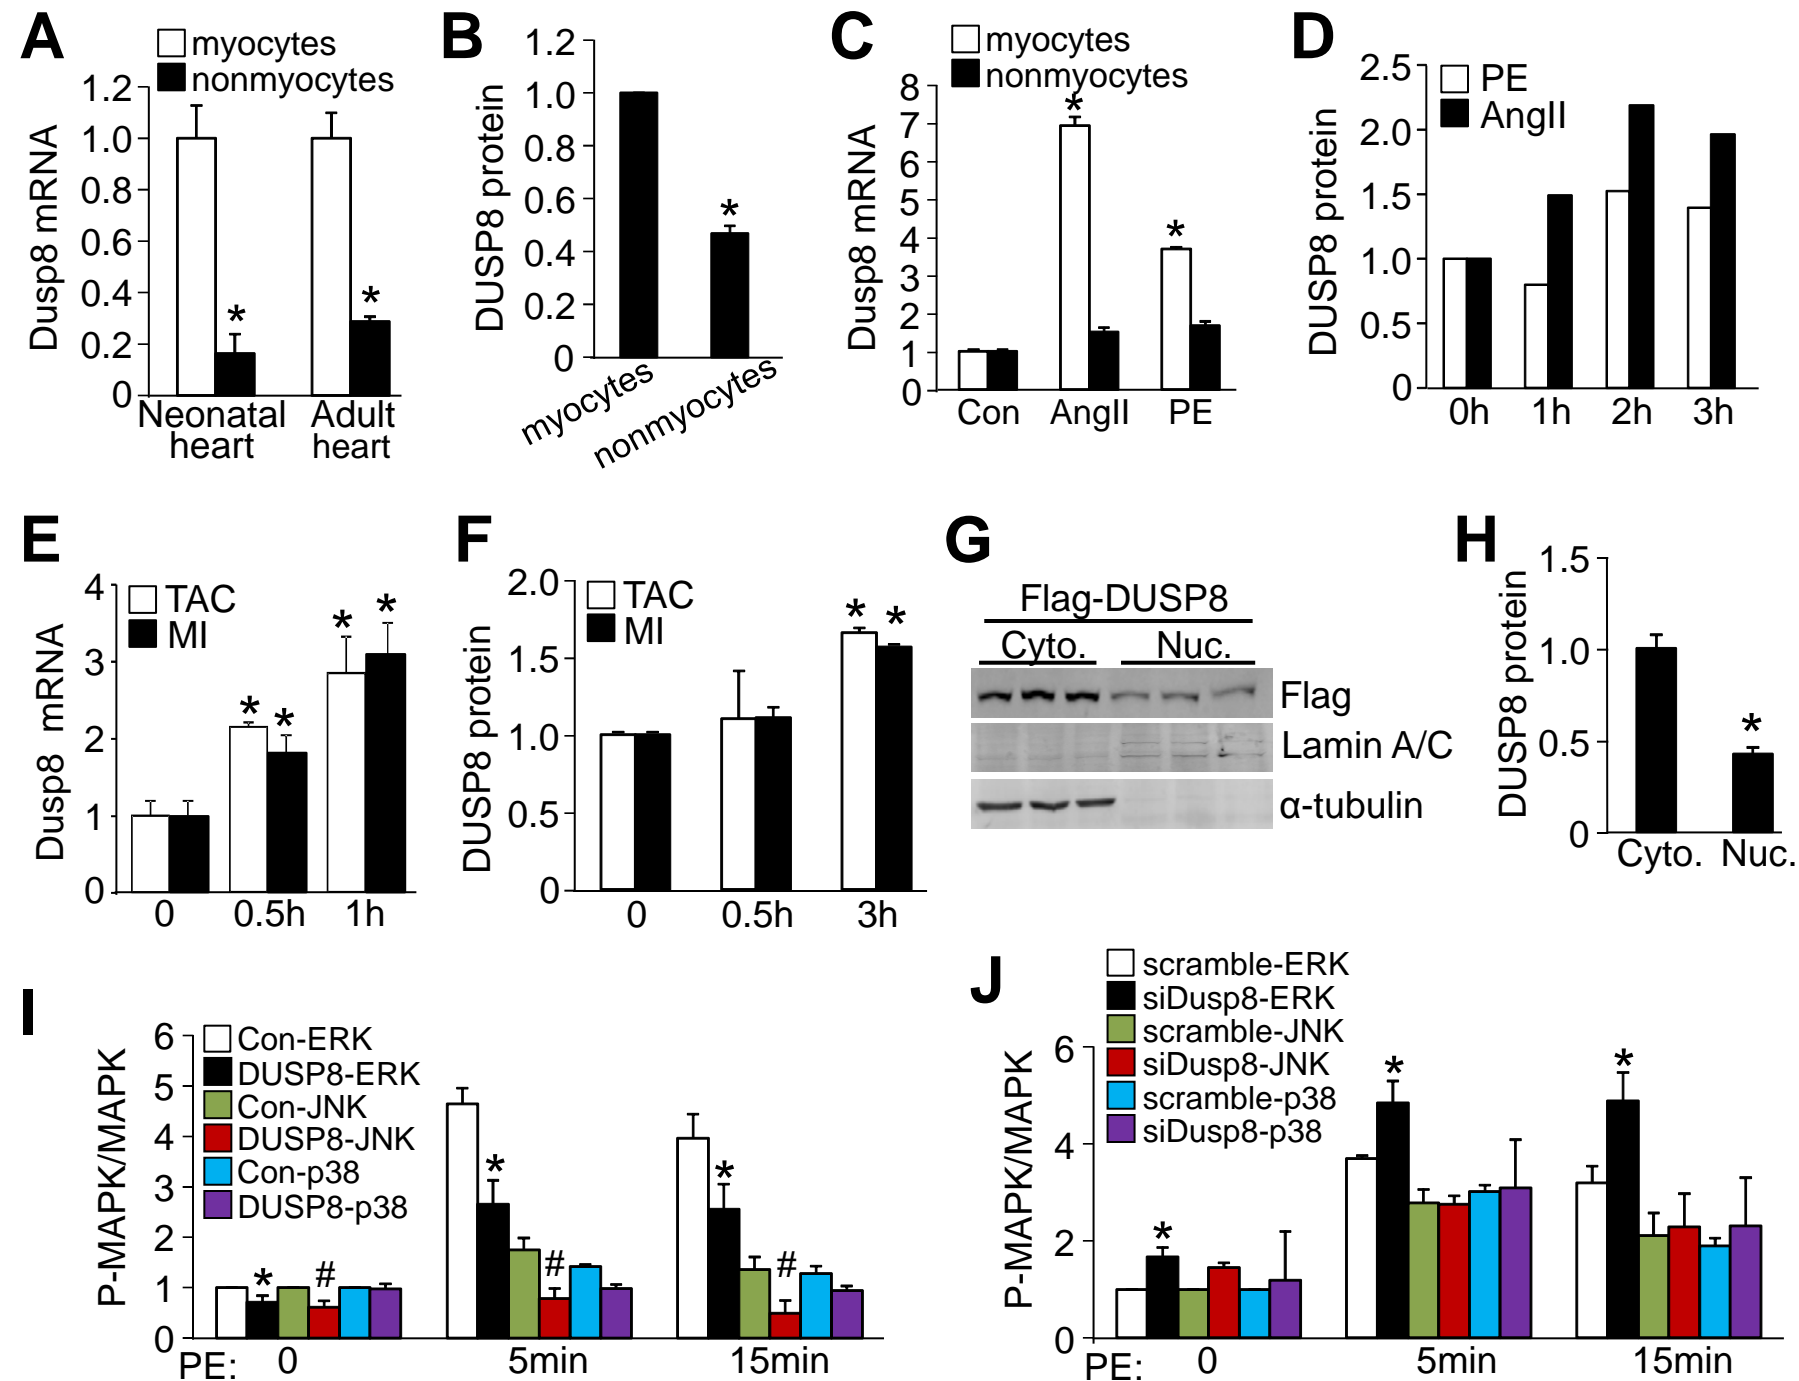

**Online Figure II. Expression and localization of DUSP8, and its effect on MAPK signaling.** **A**, Real-time PCR analysis of *Dusp8* mRNA expression in myocytes and nonmyocytes isolated from neonatal or adult hearts. \*  $p < 0.05$  vs myocytes. N=4 for each group. **B**, Quantification of DUSP8 protein expression from experiments as shown in Figure 1A. **C**, Real-time PCR analysis of *Dusp8* expression in myocytes and nonmyocytes following AngII (0.1  $\mu\text{mol/L}$ ) or PE (10  $\mu\text{mol/L}$ ) stimulation for 4 hours. \* $p < 0.05$  vs control (Con) myocytes. **D**, Quantification of DUSP8 protein induction in response to AngII or PE as shown in Figure. 1B. **E**, Real-time PCR analysis of *Dusp8* mRNA expression in the hearts of mice following TAC or MI for the indicated time periods. \* $p < 0.05$  vs 0 min sham control for TAC or MI. **F**, Quantification of DUSP8 protein induction in response to TAC or MI as shown in Figure 1C. \*  $p < 0.05$  vs 0 min sham control for TAC or MI. **G, H**, Western blot and quantitation of subcellular protein fractions for localization of Flag-DUSP8 in cytoplasm versus nucleus of HEK293 cells transfected with a Flag-*Dusp8* DNA expression plasmid. Lamin A/C and  $\alpha$ -tubulin were used as loading controls for nucleus and cytoplasm, respectively. Cyto., cytoplasm; Nuc., nucleus. **I**, Quantification of the indicated phospho-MAPK and total MAPK levels from at least 3 independent experiments as shown in Figure 1D. \* $p < 0.05$  vs control ERK (Ad $\beta$ gal infected); # $p < 0.05$  versus control JNK. **J**, Quantification of the indicated phospho-MAPK levels from at least 3 independent experiments as shown in Figure 1E. \* $p < 0.05$  vs scramble-ERK.

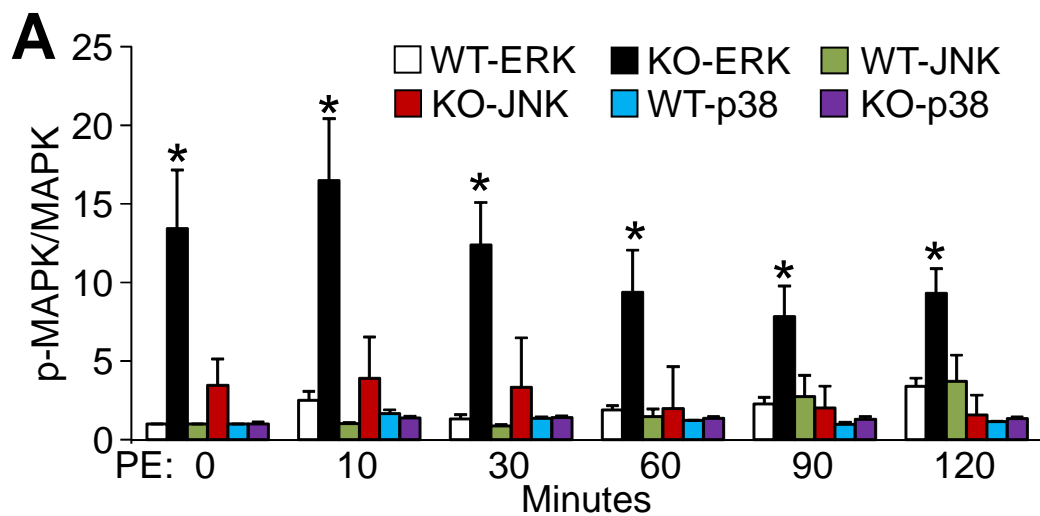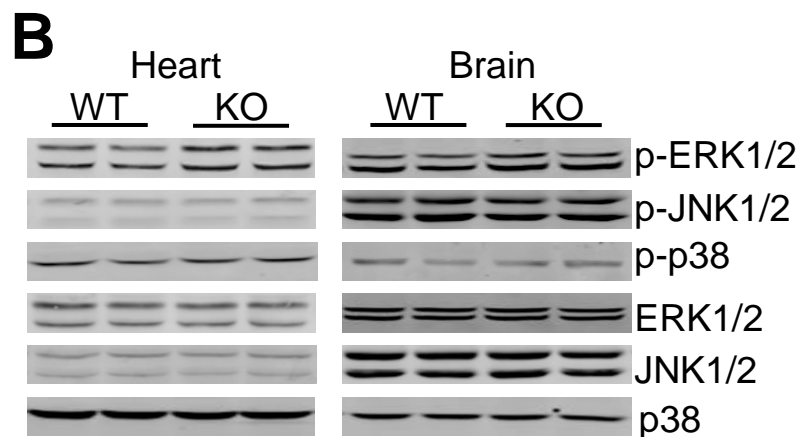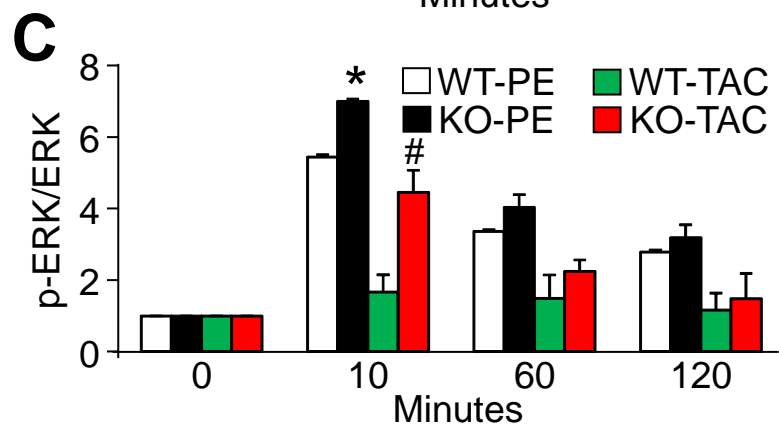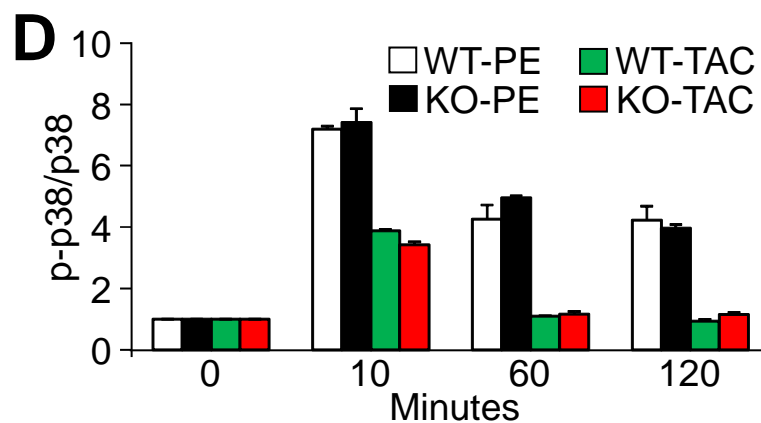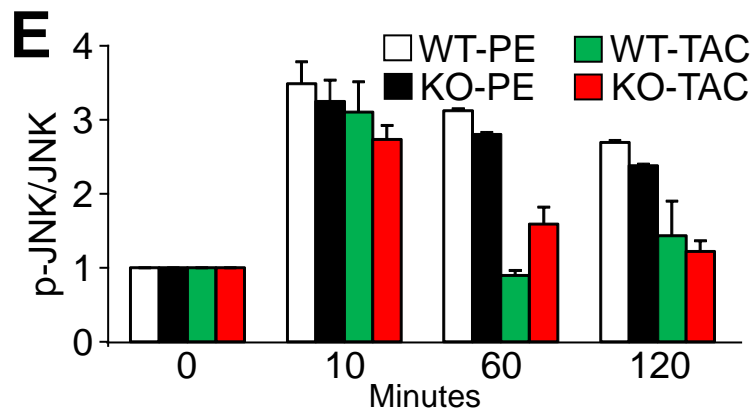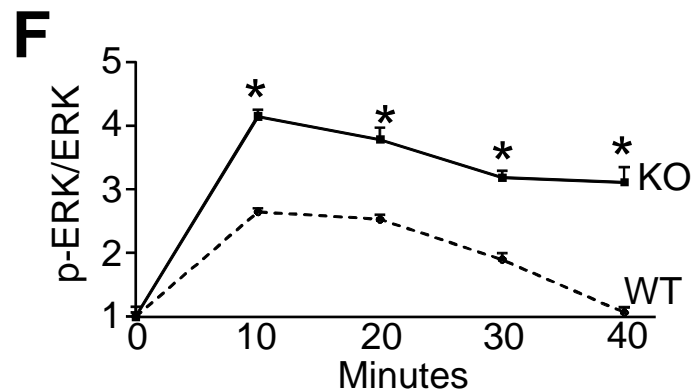

**Online Figure III. DUSP8 preferentially dephosphorylates ERK1/2 in vivo.** **A**, Quantitative analysis of phosphorylated MAPKs relative to total MAPKs in *Dusp8* WT and KO MEFs following PE (10  $\mu\text{mol/L}$ ) stimulation for indicated time shown in Figure 3A. Data are representative of at least three independent experiments. \* $p < 0.05$  vs WT ERK for each time point. **B**, Western blot analysis of MAPK phosphorylation and total MAPK levels in hearts and brains of 2 month-old *Dusp8* WT and KO mice. **C-E**, Quantitative analysis of phosphorylated MAPKs relative to total MAPKs in *Dusp8* WT and KO hearts following PE or TAC stimulation shown in Figure 3C and 3D. N=4 for each group. \* $p < 0.05$  vs WT PE; # $p < 0.05$  vs WT TAC. **F**, Quantitative analysis of phosphorylated ERK/total ERK shown in Figure 3E. At least 3 samples were quantified from each group at each time point. \* $p < 0.05$  vs WT.

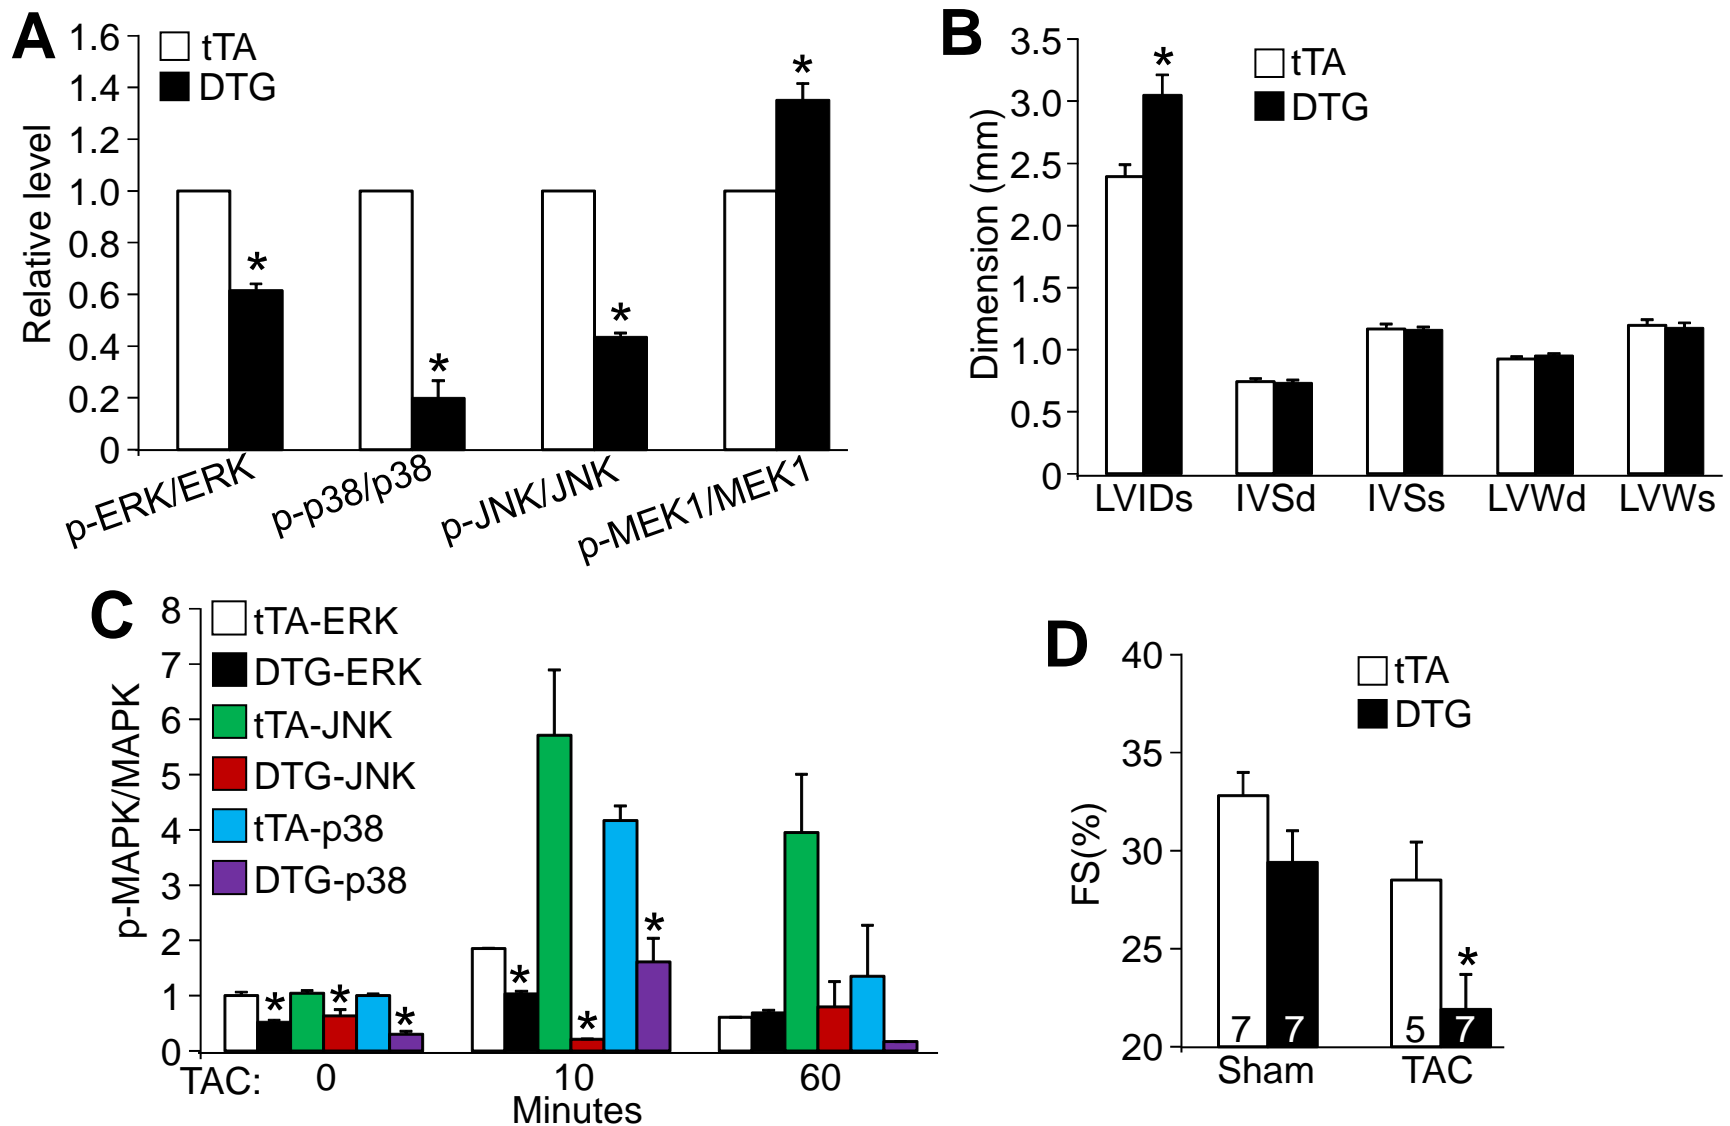

**Online Figure IV. Cardiac overexpression of DUSP8 leads to reduced MAPK activity and impaired cardiac function.** **A**, Quantitative analysis of phosphorylated MAPKs relative to total MAPKs in tTA and DTG mice shown in Figure 6D. At least 3 independent heart samples were processed in each group. \* $p < 0.05$  vs tTA. **B**, Echocardiographic parameters of hearts from tTA and DTG mice, 6 weeks after Dox removal to induce DUSP8 expression. Abbreviations: LVIDs, left ventricular end-systolic chamber diameter; IVSd and IVSs, intraventricular end-diastolic and end-systolic septal thickness; LVWd and LVWs, left ventricular end-diastolic and end-systolic posterior wall thickness. Five mice were analyzed in each group. \* $p < 0.05$  vs tTA. **C**, Quantitative analysis of phosphorylated MAPKs relative to total MAPKs in hearts from tTA and DTG mice following TAC stimulation for the indicated times as shown in Figure 6K. At least 3 independent samples were processed for each. \* $p < 0.05$  vs tTA for each respective MAPK following TAC. **D**, Echocardiography assessment of fractional shortening percentage (FS%) from hearts of tTA and DTG mice after 2 weeks of TAC or a sham procedure. Number of mice assessed is shown in the graph. Mice were 9 weeks-old, with 6 weeks no Dox. \* $p < 0.05$  vs tTA TAC.

**Online Table I.** Echocardiographic parameters in *Dusp8* WT and KO mice at baseline

|           | WT           | KO           | P value |
|-----------|--------------|--------------|---------|
| 2 months  | N=16         | N=12         |         |
| LVIDd(mm) | 3.62±0.09    | 3.43±0.06*   | 0.009   |
| LVIDs(mm) | 2.49±0.10    | 2.43±0.09    | 0.65    |
| LVWd(mm)  | 0.92±0.03    | 0.89±0.02    | 0.41    |
| LVWs(mm)  | 1.09±0.03    | 1.13±0.02    | 0.28    |
| IVSs(mm)  | 1.09±0.03    | 1.23±0.03*   | 0.001   |
| HR(bpm)   | 557.32±16.84 | 541.86±7.09  | 0.42    |
| 6 months  | N=12         | N=14         |         |
| LVIDd(mm) | 3.76±0.04    | 3.48±0.08*   | 0.04    |
| LVIDs(mm) | 2.71±0.08    | 2.61±0.07    | 0.47    |
| LVWd(mm)  | 0.96±0.02    | 0.93±0.01    | 0.08    |
| LVWs(mm)  | 1.15±0.03    | 1.15±0.02    | 0.36    |
| IVSs(mm)  | 1.15±0.03    | 1.28±0.02*   | 0.007   |
| HR(bpm)   | 473.62±11.13 | 441.56±22.01 | 0.46    |

Data are presented in millimeters (mm) as mean±SE. LVIDd and LVIDs: left ventricular end-diastolic and end-systolic chamber diameters; LVWd and LVWs: left ventricular end-diastolic and end-systolic posterior wall thickness; IVSs: end-systolic intraventricular septal thickness. HR: heart rate, which is given in beats per minute (bpm). \*p<0.05 vs WT.



**Online Table II.** Echocardiographic parameters in *Dusp8* WT and KO mice after 2 weeks of surgery.

|           | Sham                   | AngII/PE               | Sham       | TAC        |
|-----------|------------------------|------------------------|------------|------------|
| WT        | N=6                    | N=8                    | N=6        | N=10       |
| LVIDd(mm) | 3.72±0.08              | 3.99±0.09              | 3.74±0.07  | 3.91±0.03  |
| LVIDs(mm) | 2.91±0.07              | 2.88±0.13              | 2.82±0.05  | 2.73±0.08  |
| LVWd(mm)  | 0.92±0.02              | 0.89±0.03              | 0.91±0.02  | 1.00±0.03  |
| LVWs(mm)  | 1.08±0.03              | 1.07±0.04              | 1.16±0.01  | 1.18±0.03  |
| IVSd(mm)  | 0.70±0.02              | 1.07±0.04              | 0.72±0.01  | 0.82±0.03  |
| IVSs(mm)  | 1.09±0.04              | 1.19±0.04              | 1.03±0.03  | 1.21±0.05  |
| HR(bpm)   | 476±13                 | 503±24                 | 468±33     | 472±11     |
| KO        | N=6                    | N=8                    | N=10       | N=8        |
| LVIDd(mm) | 3.47±0.07 <sup>#</sup> | 3.65±0.11 <sup>#</sup> | 3.40±0.10* | 3.48±0.09* |
| LVIDs(mm) | 2.62±0.06 <sup>#</sup> | 2.43±0.08 <sup>#</sup> | 2.62±0.06* | 2.38±0.07* |
| LVWd(mm)  | 0.89±0.02              | 0.88±0.04              | 0.93±0.07  | 1.01±0.02  |
| LVWs(mm)  | 1.13±0.02              | 1.16±0.06              | 1.12±0.06  | 1.22±0.05  |
| IVSd(mm)  | 0.80±0.02 <sup>#</sup> | 1.16±0.06 <sup>#</sup> | 0.85±0.05* | 0.93±0.02* |
| IVSs(mm)  | 1.23±0.03 <sup>#</sup> | 1.14±0.03              | 1.12±0.03* | 1.32±0.03* |
| HR(bpm)   | 436±21                 | 476±20                 | 471±20     | 446±16     |

Data are presented as millimeters (mm) as the mean±SE. LVIDd and LVIDs: left ventricular end-diastolic and end-systolic chamber diameters; IVSd and IVSs: end-diastolic and end-systolic intraventricular septal thickness. LVWd and LVWs, left ventricular end-diastolic and end-systolic posterior wall thickness. HR: heart rate, which is given in beats per minute (bpm). <sup>#</sup>p<0.05 vs WT Sham-AngII/PE; \*p<0.05 vs WT Sham-TAC.
